# Supplementary material for: The Genus <em>Chaetogaster </em>Baer, 1827 (Annelida, Clitellata) in Switzerland: A First Step towards Cataloguing Its Molecular Diversity, and Description of New Species on a DNA Sequence Basis
Source: Preprints.org preprint supplement (doi:10.20944/preprints202408.0642.v1), 2024-08-09
Supplement: Supplementary file 1 [file supplementary]

| **Isolate** | **Morphospecies / group** | **Country** | **Canton** | **Locality** | **Site** | **Stream** | **Collected by** | **Collection date** | **Identified by** | **Genbank number (COI)** | **Genbank number (ITS2)** | **Genbank number (28S)** | **Specimen voucher** |
| --- | --- | --- | --- | --- | --- | --- | --- | --- | --- | --- | --- | --- | --- |
| 1 | *Chaetogaster diastrophus* MOTU10 | CH | St. Gallen | Flawil | Dws2 | Glatt River | Benoit Ferrari | November 9, 2022 | Régis Vivien | PP996388 | PQ013378 |  | GBIFCH 1222926 |
| 2 | *Chaetogaster diastrophus* MOTU10 | CH | St. Gallen | Flawil | Dws2 | Glatt River | Benoit Ferrari | November 9, 2022 | Régis Vivien | PP996389 | PQ013379 |  | GBIFCH 1222927 |
| 5 | *Chaetogaster diastrophus* MOTU9 | CH | St. Gallen | Flawil | Dws2 | Glatt River | Benoit Ferrari | November 9, 2022 | Régis Vivien | PP996390 |  |  | GBIFCH 1222928 |
| 7 | *Chaetogaster langi* MOTU5 | CH | St. Gallen | Flawil | Dws2 | Glatt River | Benoit Ferrari | November 9, 2022 | Régis Vivien | PP996391 |  |  | GBIFCH 1222929 |
| 9 | *Chaetogaster langi* MOTU5 | CH | St. Gallen | Flawil | Dws2 | Glatt River | Benoit Ferrari | November 9, 2022 | Régis Vivien | PP996392 | PQ013380 |  | GBIFCH 1222930 |
| 10 | *Chaetogaster diastrophus* MOTU10 | CH | St. Gallen | Flawil | Dws2 | Glatt River | Benoit Ferrari | November 9, 2022 | Régis Vivien | PP996393 | PQ013381 |  | GBIFCH 1222931 |
| 12 | *Chaetogaster langi* MOTU5 | CH | St. Gallen | Flawil | Dws2 | Glatt River | Benoit Ferrari | November 9, 2022 | Régis Vivien | PP996394 |  |  | GBIFCH 1222932 |
| 13 | *Chaetogaster langi* MOTU5 | CH | St. Gallen | Flawil | Dws2 | Glatt River | Benoit Ferrari | November 9, 2022 | Régis Vivien | PP996395 |  |  | GBIFCH 1222933 |
| 21 | *Chaetogaster diastrophus* MOTU10 | CH | St. Gallen | Flawil | Dws2 | Glatt River | Benoit Ferrari | November 9, 2022 | Régis Vivien | PP996396 |  |  | GBIFCH 1222934 |
| 23 | *Chaetogaster diastrophus* MOTU10 | CH | St. Gallen | Flawil | Dws1 | Glatt River | Benoit Ferrari | November 9, 2022 | Régis Vivien | PP996397 | PQ013382 |  | GBIFCH 1222935 |
| 24 | *Chaetogaster diastrophus* MOTU10 | CH | St. Gallen | Flawil | Dws1 | Glatt River | Benoit Ferrari | November 9, 2022 | Régis Vivien | PP996398 | PQ013383 |  | GBIFCH 1222936 |
| 25 | *Chaetogaster langi* MOTU5 | CH | St. Gallen | Flawil | Dws1 | Glatt River | Benoit Ferrari | November 9, 2022 | Régis Vivien | PP996399 |  |  | GBIFCH 1222937 |
| 26 | *Chaetogaster langi* MOTU5 | CH | St. Gallen | Flawil | Dws1 | Glatt River | Benoit Ferrari | November 9, 2022 | Régis Vivien | PP996400 | PQ013384 |  | GBIFCH 1222938 |
| 27 | *Chaetogaster langi* MOTU5 | CH | St. Gallen | Flawil | Dws1 | Glatt River | Benoit Ferrari | November 9, 2022 | Régis Vivien | PP996401 |  |  | GBIFCH 1222939 |
| 28 | *Chaetogaster diastrophus* MOTU10 | CH | St. Gallen | Flawil | Dws1 | Glatt River | Benoit Ferrari | November 9, 2022 | Régis Vivien | PP996402 | PQ013385 |  | GBIFCH 1222940 |
| 29 | *Chaetogaster langi* MOTU5 | CH | St. Gallen | Flawil | Dws1 | Glatt River | Benoit Ferrari | November 9, 2022 | Régis Vivien | PP996403 |  |  |  |
| 30 | *Chaetogaster diastrophus* MOTU10 | CH | St. Gallen | Flawil | Dws1 | Glatt River | Benoit Ferrari | November 9, 2022 | Régis Vivien | PP996404 | PQ013386 |  |  |
| 31 | *Chaetogaster langi* MOTU5 | CH | St. Gallen | Flawil | Dws1 | Glatt River | Benoit Ferrari | November 9, 2022 | Régis Vivien | PP996405 |  |  | GBIFCH 1222943 |
| 32 | *Chaetogaster diastrophus* MOTU10 | CH | St. Gallen | Flawil | Dws1 | Glatt River | Benoit Ferrari | November 9, 2022 | Régis Vivien | PP996406 | PQ013387 |  | GBIFCH 1222944 |
| 34 | *Chaetogaster diastrophus* MOTU9 | CH | St. Gallen | Flawil | Dws1 | Glatt River | Benoit Ferrari | November 9, 2022 | Régis Vivien | PP996407 |  |  | GBIFCH 1222945 |
| 35 | *Chaetogaster diastrophus* MOTU10 | CH | St. Gallen | Flawil | Dws1 | Glatt River | Benoit Ferrari | November 9, 2022 | Régis Vivien | PP996408 | PQ013388 |  | GBIFCH 1222946 |
| 36 | *Chaetogaster langi* MOTU5 | CH | St. Gallen | Flawil | Dws1 | Glatt River | Benoit Ferrari | November 9, 2022 | Régis Vivien | PP996409 | PQ013389 |  | GBIFCH 1222947 |
| 37 | *Chaetogaster langi* MOTU5 | CH | St. Gallen | Flawil | Dws1 | Glatt River | Benoit Ferrari | November 9, 2022 | Régis Vivien | PP996410 | PQ013390 |  |  |
| 38 | *Chaetogaster langi* MOTU5 | CH | St. Gallen | Flawil | Dws1 | Glatt River | Benoit Ferrari | November 9, 2022 | Régis Vivien | PP996411 | PQ013391 |  |  |
| 39 | *Chaetogaster langi* MOTU5 | CH | St. Gallen | Flawil | Dws1 | Glatt River | Benoit Ferrari | November 9, 2022 | Régis Vivien | PP996412 |  |  | GBIFCH 1222950 |
| 40 | *Chaetogaster langi* MOTU5 | CH | St. Gallen | Flawil | Dws1 | Glatt River | Benoit Ferrari | November 9, 2022 | Régis Vivien | PP996413 |  |  | GBIFCH 1222951 |
| 42 | *Chaetogaster langi* MOTU5 | CH | St. Gallen | Flawil | Dws1 | Glatt River | Benoit Ferrari | November 9, 2022 | Régis Vivien | PP996414 | PQ013392 |  | GBIFCH 1222952 |
| 47 | *Chaetogaster diastrophus* MOTU10 | CH | St. Gallen | Flawil | Dws1 | Glatt River | Benoit Ferrari | November 9, 2022 | Régis Vivien | PP996415 | PQ013393 |  | GBIFCH 1222953 |
| 57 | *Chaetogaster langi* MOTU5 | CH | St. Gallen | Flawil | Dws2 | Glatt River | Benoit Ferrari | November 9, 2022 | Régis Vivien | PP996416 | PQ013394 |  | GBIFCH 1222954 |
| 65 | *Chaetogaster langi* MOTU5 | CH | St. Gallen | Flawil | Dws1 | Glatt River | Benoit Ferrari | November 9, 2022 | Régis Vivien | PP996417 | PQ013395 |  | GBIFCH 1222955 |
| 67 | *Chaetogaster diastrophus* MOTU10 | CH | St. Gallen | Flawil | Dws1 | Glatt River | Benoit Ferrari | November 9, 2022 | Régis Vivien |  | PQ013396 |  | GBIFCH 1222956 |
| 69 | *Chaetogaster langi* MOTU5 | CH | St. Gallen | Flawil | Dws1 | Glatt River | Benoit Ferrari | November 9, 2022 | Régis Vivien | PP996418 | PQ013397 |  | GBIFCH 1222957 |
| 70 | *Chaetogaster langi* MOTU5 | CH | St. Gallen | Flawil | Dws1 | Glatt River | Benoit Ferrari | November 9, 2022 | Régis Vivien | PP996419 | PQ013398 |  | GBIFCH 1222958 |
| 71 | *Chaetogaster langi* MOTU5 | CH | St. Gallen | Flawil | Dws1 | Glatt River | Benoit Ferrari | November 9, 2022 | Régis Vivien | PP996420 | PQ013399 |  | GBIFCH 1222959 |
| 76 | *Chaetogaster diastrophus* MOTU10 | CH | St. Gallen | Flawil | Dws1 | Glatt River | Benoit Ferrari | November 9, 2022 | Régis Vivien | PP996421 | PQ013400 |  | GBIFCH 1222960 |
| 78 | *Chaetogaster langi* MOTU5 | CH | St. Gallen | Flawil | Dws1 | Glatt River | Benoit Ferrari | November 9, 2022 | Régis Vivien | PP996422 | PQ013401 |  | GBIFCH 1222961 |
| 85 | *Chaetogaster diastrophus* MOTU10 | CH | St. Gallen | Flawil | Dws1 | Glatt River | Benoit Ferrari | November 9, 2022 | Régis Vivien | PP996423 | PQ013402 |  | GBIFCH 1222962 |
| 86 | *Chaetogaster diastrophus* MOTU9 | CH | St. Gallen | Flawil | Dws1 | Glatt River | Benoit Ferrari | November 9, 2022 | Régis Vivien | PP996424 |  |  | GBIFCH 1222963 |
| 87 | *Chaetogaster langi* MOTU5 | CH | Bern | Villeret | 9 | Suze River | Pascal Mulattieri | April 7, 2023 | Régis Vivien | PP996425 | PQ013403 | PQ013491 | GBIFCH 1222964 |
| 88 | *Chaetogaster diastrophus* MOTU10 | CH | Bern | Villeret | 9 | Suze River | Pascal Mulattieri | April 7, 2023 | Régis Vivien | PP996426 | PQ013404 | PQ013492 | GBIFCH 1222965 |
| 89 | *Chaetogaster langi* MOTU5 | CH | Bern | Villeret | 9 | Suze River | Pascal Mulattieri | April 7, 2023 | Régis Vivien | PP996427 | PQ013405 | PQ013493 | GBIFCH 1222966 |
| 90 | *Chaetogaster langi* MOTU5 | CH | Bern | Villeret | 9 | Suze River | Pascal Mulattieri | April 7, 2023 | Régis Vivien | PP996428 | PQ013406 | PQ013494 | GBIFCH 1222967 |
| 97 | *Chaetogaster diastrophus* MOTU10 | CH | Bern | Villeret | 9 | Suze River | Pascal Mulattieri | April 7, 2023 | Régis Vivien | PP996429 | PQ013407 |  | GBIFCH 1222968 |
| 98 | *Chaetogaster diastrophus* MOTU3 | CH | Bern | Villeret | 9 | Suze River | Pascal Mulattieri | April 7, 2023 | Régis Vivien | PP996430 | PQ013408 | PQ013495 | GBIFCH 1222969 |
| 99 | *Chaetogaster setosus* MOTU4 | CH | Bern | Villeret | 9 | Suze River | Pascal Mulattieri | April 7, 2023 | Régis Vivien | PP996431 | PQ013409 | PQ013496 | GBIFCH 1222970 |
| 100 | *Chaetogaster diastrophus* MOTU10 | CH | Bern | Villeret | 9 | Suze River | Pascal Mulattieri | April 7, 2023 | Régis Vivien | PP996432 | PQ013410 | PQ013497 | GBIFCH 1222971 |
| 101 | *Chaetogaster diastrophus* MOTU9 | CH | Bern | Villeret | 9 | Suze River | Pascal Mulattieri | April 7, 2023 | Régis Vivien | PP996433 | PQ013411 | PQ013498 | GBIFCH 1222972 |
| 110 | *Chaetogaster diastrophus* MOTU10 | CH | Bern | Villeret | 9 | Suze River | Pascal Mulattieri | April 7, 2023 | Régis Vivien | PP996434 | PQ013412 | PQ013499 | GBIFCH 1222973 |
| 111 | *Chaetogaster setosus* MOTU4 | CH | Bern | Villeret | 9 | Suze River | Pascal Mulattieri | April 7, 2023 | Régis Vivien | PP996435 | PQ013413 | PQ013500 | GBIFCH 1222974 |
| 112 | *Chaetogaster langi* MOTU5 | CH | Bern | Villeret | 9 | Suze River | Pascal Mulattieri | April 7, 2023 | Régis Vivien | PP996436 | PQ013414 | PQ013501 | GBIFCH 1222975 |
| 113 | *Chaetogaster* sp. MOTU1 | CH | Bern | Villeret | 9 | Suze River | Pascal Mulattieri | April 7, 2023 | Régis Vivien | PP996437 | PQ013415 | PQ013502 | GBIFCH 1222976 |
| 127 | *Chaetogaster diastrophus* MOTU9 | CH | Vaud | Ecublens | UNIL-Sorge | Sorge River | Régis Vivien | April 2020 | Régis Vivien | PP996438 | PQ013416 |  | GBIFCH 1222977 |
| 128 | *Chaetogaster diastrophus* MOTU9 | CH | Vaud | Ecublens | UNIL-Sorge | Sorge River | Régis Vivien | April 2020 | Régis Vivien | PP996439 | PQ013417 | PQ013503 | GBIFCH 1222978 |
| 129 | *Chaetogaster diastrophus* MOTU9 | CH | Vaud | Ecublens | UNIL-Sorge | Sorge River | Régis Vivien | April 2020 | Régis Vivien | PP996440 | PQ013418 | PQ013504 | GBIFCH 1222979 |
| 130 | *Chaetogaster diastrophus* MOTU9 | CH | Vaud | Ecublens | UNIL-Sorge | Sorge River | Régis Vivien | April 2020 | Régis Vivien | PP996441 | PQ013419 | PQ013505 | GBIFCH 1222980 |
| 131 | *Chaetogaster diastrophus* MOTU10 | CH | Vaud | Ecublens | UNIL-Sorge | Sorge River | Régis Vivien | April 2020 | Régis Vivien | PP996442 | PQ013420 | PQ013506 | GBIFCH 1222981 |
| 132 | *Chaetogaster langi* MOTU5 | CH | Vaud | Ecublens | UNIL-Sorge | Sorge River | Régis Vivien | April 2020 | Régis Vivien | PP996443 |  | PQ013507 | GBIFCH 1222982 |
| 134 | *Chaetogaster* sp. MOTU2 | CH | Vaud | Ecublens | UNIL-Sorge | Sorge River | Régis Vivien | April 2020 | Régis Vivien | PP996444 | PQ013421 | PQ013508 | GBIFCH 1222983 |
| 138 | *Chaetogaster setosus* MOTU4 | CH | Bern | Villeret | 9 | Suze River | Pascal Mulattieri | April 7, 2023 | Régis Vivien | PP996445 | PQ013422 | PQ013509 | GBIFCH 1222984 |
| 139 | *Chaetogaster diastrophus* MOTU10 | CH | Bern | Villeret | 9 | Suze River | Pascal Mulattieri | April 7, 2023 | Régis Vivien | PP996446 | PQ013423 | PQ013510 | GBIFCH 1222985 |
| 140 | *Chaetogaster langi* MOTU5 | CH | Bern | Villeret | 9 | Suze River | Pascal Mulattieri | April 7, 2023 | Régis Vivien | PP996447 |  | PQ013511 | GBIFCH 1222986 |
| 141 | *Chaetogaster diastrophus* MOTU9 | CH | Bern | Villeret | 9 | Suze River | Pascal Mulattieri | April 7, 2023 | Régis Vivien | PP996448 | PQ013424 | PQ013512 | GBIFCH 1222987 |
| 142 | *Chaetogaster langi* MOTU5 | CH | Bern | Villeret | 9 | Suze River | Pascal Mulattieri | April 7, 2023 | Régis Vivien | PP996449 | PQ013425 | PQ013513 | GBIFCH 1222988 |
| 147 | *Chaetogaster setosus* MOTU4 | CH | Bern | Villeret | 9 | Suze River | Pascal Mulattieri | April 7, 2023 | Régis Vivien | PP996450 | PQ013426 | PQ013514 | GBIFCH 1222989 |
| 148 | *Chaetogaster diastrophus* MOTU10 | CH | Bern | Villeret | 9 | Suze River | Pascal Mulattieri | April 7, 2023 | Régis Vivien | PP996451 | PQ013427 | PQ013515 | GBIFCH 1222990 |
| 149 | *Chaetogaster langi* MOTU5 | CH | Bern | Villeret | 9 | Suze River | Pascal Mulattieri | April 7, 2023 | Régis Vivien | PP996452 | PQ013428 | PQ013516 | GBIFCH 1222991 |
| 150 | *Chaetogaster langi* MOTU5 | CH | Bern | Villeret | 9 | Suze River | Pascal Mulattieri | April 7, 2023 | Régis Vivien | PP996453 | PQ013429 | PQ013517 | GBIFCH 1222992 |
| 151 | *Chaetogaster diastrophus* MOTU10 | CH | Bern | Villeret | 9 | Suze River | Pascal Mulattieri | April 7, 2023 | Régis Vivien | PP996454 | PQ013430 | PQ013518 | GBIFCH 1222993 |
| 155 | *Chaetogaster diastrophus* MOTU9 | CH | Bern | Villeret | 9 | Suze River | Pascal Mulattieri | April 7, 2023 | Régis Vivien | PP996455 | PQ013431 |  |  |
| 156 | *Chaetogaster diastrophus* MOTU10 | CH | Bern | Villeret | 9 | Suze River | Pascal Mulattieri | April 7, 2023 | Régis Vivien | PP996456 | PQ013432 |  | GBIFCH 1222995 |
| 157 | *Chaetogaster diastrophus* MOTU9 | CH | Bern | Villeret | 9 | Suze River | Pascal Mulattieri | April 7, 2023 | Régis Vivien | PP996457 | PQ013433 | PQ013519 | GBIFCH 1222996 |
| 159 | *Chaetogaster diastrophus* MOTU9 | CH | Bern | Villeret | 9 | Suze River | Pascal Mulattieri | April 7, 2023 | Régis Vivien | PP996458 |  |  | GBIFCH 1222997 |
| 160 | *Chaetogaster diastrophus* MOTU9 | CH | Bern | Villeret | 9 | Suze River | Pascal Mulattieri | April 7, 2023 | Régis Vivien | PP996459 | PQ013434 |  | GBIFCH 1222998 |
| 161 | *Chaetogaster setosus* MOTU4 | CH | Bern | Villeret | 9 | Suze River | Pascal Mulattieri | April 7, 2023 | Régis Vivien | PP996460 | PQ013435 | PQ013520 | GBIFCH 1222999 |
| 162 | *Chaetogaster diastrophus* MOTU10 | CH | Bern | Villeret | 9 | Suze River | Pascal Mulattieri | April 7, 2023 | Régis Vivien | PP996461 | PQ013436 | PQ013521 | GBIFCH 1223000 |
| 163 | *Chaetogaster diastrophus* MOTU10 | CH | Bern | Villeret | 9 | Suze River | Pascal Mulattieri | April 7, 2023 | Régis Vivien | PP996462 | PQ013437 | PQ013522 | GBIFCH 1223001 |
| 164 | *Chaetogaster diastrophus* MOTU10 | CH | Bern | Villeret | 9 | Suze River | Pascal Mulattieri | April 7, 2023 | Régis Vivien | PP996463 | PQ013438 | PQ013523 | GBIFCH 1223002 |
| 165 | *Chaetogaster* sp. MOTU2 | CH | Bern | Villeret | 9 | Suze River | Pascal Mulattieri | April 7, 2023 | Régis Vivien | PP996464 | PQ013439 | PQ013524 | GBIFCH 1223003 |
| CDS1 | *Chaetogaster diastrophus* MOTU3 | CH | Aargau | Muri | Dws3 | Bünz River | Régis Vivien et Benoit Ferrari | May 25 2021 | Régis Vivien | PP996465 | PQ013440 | PQ013525 | GBIFCH 1223004 |
| CDS2 | *Chaetogaster diastrophus* MOTU3 | CH | Aargau | Muri | Dws3 | Bünz River | Régis Vivien et Benoit Ferrari | May 25 2021 | Régis Vivien | PP996466 | PQ013441 | PQ013526 | GBIFCH 1223005 |
| CDP1 | *Chaetogaster diaphanus* MOTU6 | CH | Aargau | Muri | Dws3 | Bünz River | Régis Vivien et Benoit Ferrari | May 25 2021 | Régis Vivien | PP996467 |  |  | GBIFCH 1223006 |
| CDP2 | *Chaetogaster diaphanus* MOTU7 | CH | Aargau | Muri | Dws3 | Bünz River | Régis Vivien et Benoit Ferrari | May 25 2021 | Régis Vivien | PP996468 | PQ013442 | PQ013527 | GBIFCH 1223007 |
| CDP3 | *Chaetogaster diaphanus* MOTU6 | CH | Aargau | Muri | Dws3 | Bünz River | Régis Vivien et Benoit Ferrari | May 25 2021 | Régis Vivien | PP996469 | PQ013443 | PQ013528 | GBIFCH 1223008 |
| CDP4 | *Chaetogaster diaphanus* MOTU6 | CH | Aargau | Muri | Dws3 | Bünz River | Régis Vivien et Benoit Ferrari | May 25 2021 | Régis Vivien | PP996470 |  |  | GBIFCH 1223009 |
| CDP5 | *Chaetogaster diaphanus* MOTU6 | CH | Aargau | Muri | Dws3 | Bünz River | Régis Vivien et Benoit Ferrari | May 25 2021 | Régis Vivien | PP996471 | PQ013444 |  | GBIFCH 1223010 |
| G4 | *Chaetogaster diaphanus* MOTU6 | CH | St. Gallen | Flawil | Dws2 | Glatt River | Régis Vivien et Benoit Ferrari | May 31, 2022 | Régis Vivien | PP996472 | PQ013445 |  | GBIFCH 1223011 |
| Sor6 | *Chaetogaster diaphanus* MOTU6 | CH | Vaud | Ecublens | UNIL-Sorge | Sorge River | Régis Vivien | April 2020 | Régis Vivien | PP996473 | PQ013446 | PQ013529 | GBIFCH 1223012 |
| Sor7 | *Chaetogaster diaphanus* MOTU6 | CH | Vaud | Ecublens | UNIL-Sorge | Sorge River | Régis Vivien | April 2020 | Régis Vivien | PP996474 | PQ013447 | PQ013530 | GBIFCH 1223013 |
| Sor8 | *Chaetogaster diaphanus* MOTU6 | CH | Vaud | Ecublens | UNIL-Sorge | Sorge River | Régis Vivien | April 2020 | Régis Vivien | PP996475 | PQ013448 | PQ013531 | GBIFCH 1223014 |
| Sor9 | *Chaetogaster diaphanus* MOTU6 | CH | Vaud | Ecublens | UNIL-Sorge | Sorge River | Régis Vivien | April 2020 | Régis Vivien | PP996476 | PQ013449 | PQ013532 | GBIFCH 1223015 |
| Glatt6 | *Chaetogaster* sp. MOTU8 | CH | St. Gallen | Flawil | Dws4 | Glatt River | Régis Vivien et Benoit Ferrari | October 28, 2020 | Régis Vivien | PP996477 | PQ013450 | PQ013533 |  |
| 183 | *Chaetogaster diaphanus* MOTU7 | CH | Aargau | Muri | Dws3 | Bünz River | Régis Vivien et Benoit Ferrari | May 25 2021 | Régis Vivien | PP996478 | PQ013451 | PQ013534 | GBIFCH 1223017 |
| 184 | *Chaetogaster diaphanus* MOTU7 | CH | Aargau | Muri | Dws3 | Bünz River | Régis Vivien et Benoit Ferrari | May 25 2021 | Régis Vivien | PP996479 | PQ013452 | PQ013535 | GBIFCH 1223018 |
| 185 | *Chaetogaster diaphanus* MOTU7 | CH | Aargau | Muri | Dws3 | Bünz River | Régis Vivien et Benoit Ferrari | May 25 2021 | Régis Vivien | PP996480 | PQ013453 |  | GBIFCH 1223019 |
| 186 | *Chaetogaster diaphanus* MOTU7 | CH | Aargau | Muri | Dws3 | Bünz River | Régis Vivien et Benoit Ferrari | May 25 2021 | Régis Vivien | PP996481 | PQ013454 | PQ013536 | GBIFCH 1223020 |
| 187 | *Chaetogaster diaphanus* MOTU7 | CH | Aargau | Muri | Dws3 | Bünz River | Régis Vivien et Benoit Ferrari | May 25 2021 | Régis Vivien | PP996482 | PQ013455 | PQ013537 | GBIFCH 1223021 |
| 189 | *Chaetogaster diaphanus* MOTU7 | CH | Aargau | Muri | Dws3 | Bünz River | Régis Vivien et Benoit Ferrari | May 25 2021 | Régis Vivien | PP996483 | PQ013456 | PQ013538 | GBIFCH 1223022 |
| 190 | *Chaetogaster diaphanus* MOTU7 | CH | Aargau | Muri | Dws3 | Bünz River | Régis Vivien et Benoit Ferrari | May 25 2021 | Régis Vivien | PP996484 | PQ013457 | PQ013539 | GBIFCH 1223023 |
| 191 | *Chaetogaster diaphanus* MOTU7 | CH | Aargau | Muri | Dws3 | Bünz River | Régis Vivien et Benoit Ferrari | May 25 2021 | Régis Vivien | PP996485 | PQ013458 | PQ013540 | GBIFCH 1223024 |
| 192 | *Chaetogaster diaphanus* MOTU7 | CH | Aargau | Muri | Dws3 | Bünz River | Régis Vivien et Benoit Ferrari | May 25 2021 | Régis Vivien | PP996486 | PQ013459 | PQ013541 | GBIFCH 1223025 |
| 193 | *Chaetogaster diaphanus* MOTU7 | CH | Aargau | Muri | Dws3 | Bünz River | Régis Vivien et Benoit Ferrari | May 25 2021 | Régis Vivien | PP996487 | PQ013460 | PQ013542 | GBIFCH 1223026 |
| 194 | *Chaetogaster diaphanus* MOTU7 | CH | Aargau | Muri | Dws3 | Bünz River | Régis Vivien et Benoit Ferrari | May 25 2021 | Régis Vivien | PP996488 | PQ013461 | PQ013543 | GBIFCH 1223027 |
| 195 | *Chaetogaster diastrophus* MOTU3 | CH | Aargau | Muri | Dws3 | Bünz River | Régis Vivien et Benoit Ferrari | May 25 2021 | Régis Vivien | PP996489 | PQ013462 |  | GBIFCH 1223028 |
| 196 | *Chaetogaster diastrophus* MOTU3 | CH | Aargau | Muri | Dws3 | Bünz River | Régis Vivien et Benoit Ferrari | May 25 2021 | Régis Vivien | PP996490 |  |  | GBIFCH 1223029 |
| 197 | *Chaetogaster diastrophus* MOTU3 | CH | Aargau | Muri | Dws3 | Bünz River | Régis Vivien et Benoit Ferrari | May 25 2021 | Régis Vivien | PP996491 | PQ013463 |  | GBIFCH 1223030 |
| 198 | *Chaetogaster diastrophus* MOTU3 | CH | Aargau | Muri | Dws3 | Bünz River | Régis Vivien et Benoit Ferrari | May 25 2021 | Régis Vivien | PP996492 | PQ013464 | PQ013544 | GBIFCH 1223031 |
| 199 | *Chaetogaster diastrophus* MOTU3 | CH | Aargau | Muri | Dws3 | Bünz River | Régis Vivien et Benoit Ferrari | May 25 2021 | Régis Vivien | PP996493 | PQ013465 | PQ013545 | GBIFCH 1223032 |
| 200 | *Chaetogaster diastrophus* MOTU3 | CH | Aargau | Muri | Dws3 | Bünz River | Régis Vivien et Benoit Ferrari | May 25 2021 | Régis Vivien | PP996494 |  |  | GBIFCH 1223033 |
| 201 | *Chaetogaster diaphanus* MOTU6 | CH | Aargau | Muri | Dws3 | Bünz River | Régis Vivien et Benoit Ferrari | May 25 2021 | Régis Vivien | PP996495 | PQ013466 |  | GBIFCH 1223034 |
| 202 | *Chaetogaster diaphanus* MOTU6 | CH | Aargau | Muri | Dws3 | Bünz River | Régis Vivien et Benoit Ferrari | May 25 2021 | Régis Vivien | PP996496 | PQ013467 | PQ013546 | GBIFCH 1223035 |
| 203 | *Chaetogaster diaphanus* MOTU7 | CH | Aargau | Muri | Dws3 | Bünz River | Régis Vivien et Benoit Ferrari | May 25 2021 | Régis Vivien | PP996497 | PQ013468 | PQ013547 | GBIFCH 1223036 |
| 204 | *Chaetogaster diaphanus* MOTU7 | CH | Aargau | Muri | Dws3 | Bünz River | Régis Vivien et Benoit Ferrari | May 25 2021 | Régis Vivien | PP996498 | PQ013469 | PQ013548 |  |
| 205 | *Chaetogaster diaphanus* MOTU6 | CH | Aargau | Muri | Dws3 | Bünz River | Régis Vivien et Benoit Ferrari | May 25 2021 | Régis Vivien | PP996499 | PQ013470 | PQ013549 |  |
| 206 | *Chaetogaster diaphanus* MOTU7 | CH | Aargau | Muri | Dws3 | Bünz River | Régis Vivien et Benoit Ferrari | May 25 2021 | Régis Vivien | PP996500 | PQ013471 | PQ013550 | GBIFCH 1223039 |
| 207 | *Chaetogaster diaphanus* MOTU7 | CH | Aargau | Muri | Dws3 | Bünz River | Régis Vivien et Benoit Ferrari | May 25 2021 | Régis Vivien | PP996501 | PQ013472 | PQ013551 | GBIFCH 1223040 |
| 209 | *Chaetogaster diaphanus* MOTU6 | CH | Aargau | Muri | Dws3 | Bünz River | Régis Vivien et Benoit Ferrari | May 25 2021 | Régis Vivien | PP996502 | PQ013473 | PQ013552 | GBIFCH 1223041 |
| 210 | *Chaetogaster diaphanus* MOTU7 | CH | Aargau | Muri | Dws3 | Bünz River | Régis Vivien et Benoit Ferrari | May 25 2021 | Régis Vivien | PP996503 | PQ013474 | PQ013553 | GBIFCH 1223042 |
| 211 | *Chaetogaster diaphanus* MOTU7 | CH | Aargau | Muri | Dws3 | Bünz River | Régis Vivien et Benoit Ferrari | May 25 2021 | Régis Vivien | PP996504 | PQ013475 | PQ013554 | GBIFCH 1223043 |
| 212 | *Chaetogaster diastrophus* MOTU3 | CH | Aargau | Muri | Dws3 | Bünz River | Régis Vivien et Benoit Ferrari | May 25 2021 | Régis Vivien | PP996505 | PQ013476 |  | GBIFCH 1223044 |
| 213 | *Chaetogaster diastrophus* MOTU3 | CH | Aargau | Muri | Dws3 | Bünz River | Régis Vivien et Benoit Ferrari | May 25 2021 | Régis Vivien | PP996506 | PQ013477 | PQ013555 | GBIFCH 1223045 |
| 214 | *Chaetogaster diastrophus* MOTU3 | CH | Aargau | Muri | Dws3 | Bünz River | Régis Vivien et Benoit Ferrari | May 25 2021 | Régis Vivien | PP996507 |  |  | GBIFCH 1223046 |
| 215 | *Chaetogaster diastrophus* MOTU3 | CH | Aargau | Muri | Dws3 | Bünz River | Régis Vivien et Benoit Ferrari | May 25 2021 | Régis Vivien | PP996508 | PQ013478 | PQ013556 | GBIFCH 1223047 |
| 216 | *Chaetogaster diastrophus* MOTU3 | CH | Aargau | Muri | Dws3 | Bünz River | Régis Vivien et Benoit Ferrari | May 25 2021 | Régis Vivien | PP996509 | PQ013479 |  | GBIFCH 1223048 |
| 219 | *Chaetogaster diaphanus* MOTU7 | CH | Aargau | Muri | Dws3 | Bünz River | Régis Vivien et Benoit Ferrari | May 25 2021 | Régis Vivien | PP996510 | PQ013480 | PQ013557 | GBIFCH 1223049 |
| 220 | *Chaetogaster diastrophus* MOTU10 | CH | St. Gallen | Flawil | Dws4 | Bünz River | Régis Vivien et Benoit Ferrari | October 28, 2020 | Régis Vivien | PP996511 | PQ013481 |  | GBIFCH 1223050 |
| 221 | *Chaetogaster diastrophus* MOTU10 | CH | St. Gallen | Flawil | Dws4 | Bünz River | Régis Vivien et Benoit Ferrari | October 28, 2020 | Régis Vivien | PP996512 | PQ013482 |  | GBIFCH 1223051 |
| 222 | *Chaetogaster diastrophus* MOTU10 | CH | St. Gallen | Flawil | Dws4 | Bünz River | Régis Vivien et Benoit Ferrari | October 28, 2020 | Régis Vivien | PP996513 | PQ013483 |  | GBIFCH 1223052 |
| 223 | *Chaetogaster diastrophus* MOTU10 | CH | St. Gallen | Flawil | Dws4 | Bünz River | Régis Vivien et Benoit Ferrari | October 28, 2020 | Régis Vivien | PP996514 | PQ013484 |  | GBIFCH 1223053 |
| 224 | *Chaetogaster diastrophus* MOTU10 | CH | St. Gallen | Flawil | Dws4 | Bünz River | Régis Vivien et Benoit Ferrari | October 28, 2020 | Régis Vivien | PP996515 | PQ013485 |  | GBIFCH 1223054 |
| 225 | *Chaetogaster diastrophus* MOTU10 | CH | St. Gallen | Flawil | Dws4 | Bünz River | Régis Vivien et Benoit Ferrari | October 28, 2020 | Régis Vivien | PP996516 | PQ013486 |  | GBIFCH 1223055 |
| 226 | *Chaetogaster diastrophus* MOTU10 | CH | St. Gallen | Flawil | Dws4 | Bünz River | Régis Vivien et Benoit Ferrari | October 28, 2020 | Régis Vivien | PP996517 |  |  | GBIFCH 1223056 |
| 227 | *Chaetogaster diastrophus* MOTU10 | CH | St. Gallen | Flawil | Dws4 | Bünz River | Régis Vivien et Benoit Ferrari | October 28, 2020 | Régis Vivien | PP996518 | PQ013487 |  | GBIFCH 1223057 |
| 228 | *Chaetogaster diastrophus* MOTU10 | CH | St. Gallen | Flawil | Dws4 | Bünz River | Régis Vivien et Benoit Ferrari | October 28, 2020 | Régis Vivien | PP996519 | PQ013488 |  | GBIFCH 1223058 |
| 229 | *Chaetogaster diastrophus* MOTU10 | CH | St. Gallen | Flawil | Dws4 | Bünz River | Régis Vivien et Benoit Ferrari | October 28, 2020 | Régis Vivien | PP996520 | PQ013489 |  | GBIFCH 1223059 |
| 230 | *Chaetogaster diastrophus* MOTU10 | CH | St. Gallen | Flawil | Dws4 | Bünz River | Régis Vivien et Benoit Ferrari | October 28, 2020 | Régis Vivien | PP996521 | PQ013490 |  | GBIFCH 1223060 |
