# Supplementary figures and images for: The Genus <em>Chaetogaster </em>Baer, 1827 (Annelida, Clitellata) in Switzerland: A First Step towards Cataloguing Its Molecular Diversity, and Description of New Species on a DNA Sequence Basis
Source: Preprints.org preprint supplement (doi:10.20944/preprints202408.0642.v1), 2024-08-09

ASAP  
mPTP

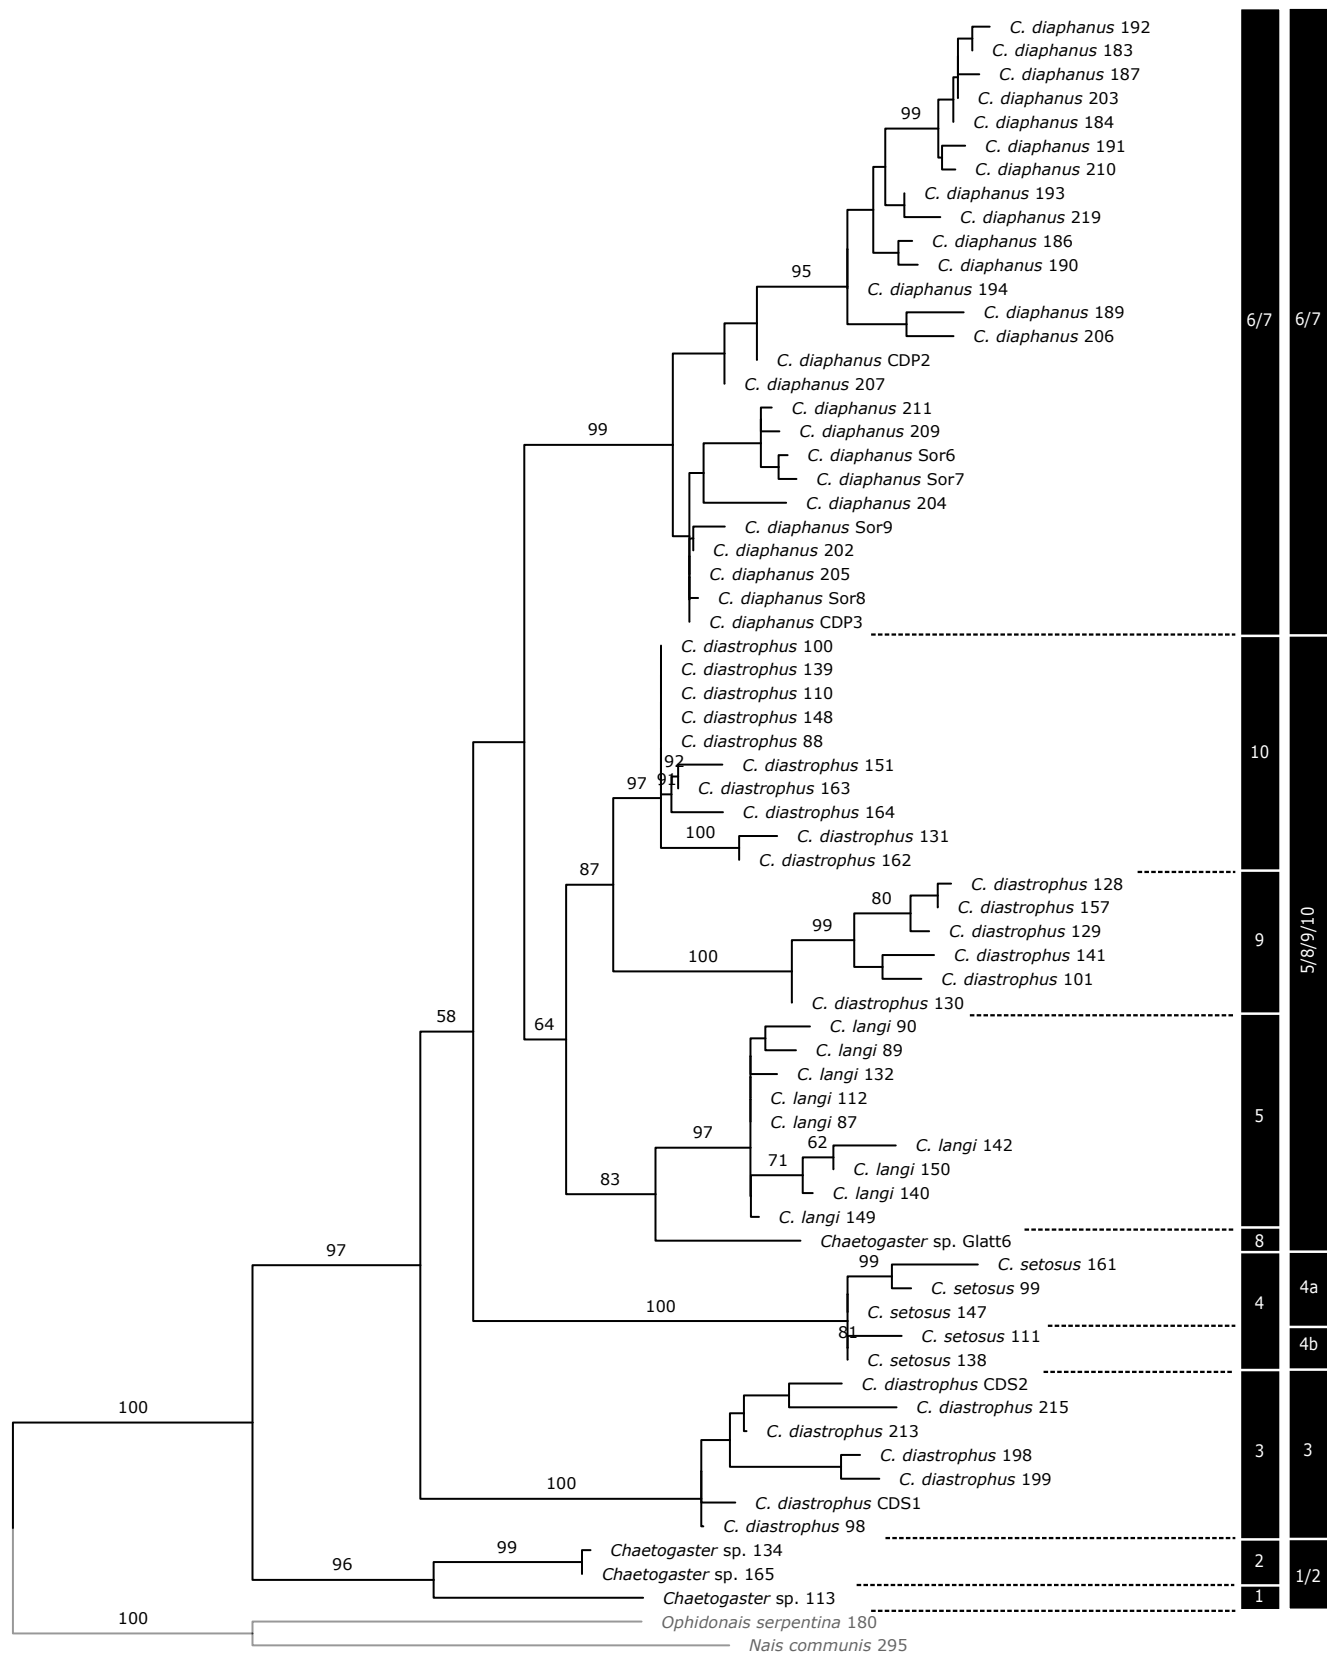

0.03

Supplement: Supplementary file 1 [file supplementary]
